# Supplementary material for: Early prediction of biomass in hybrid rye based on hyperspectral data surpasses genomic predictability in less-related breeding material
Source: PubMed Central journal article supplement (PMC8081675; doi:10.1007/s00122-021-03779-1), 2021-02-17
Supplement: 122_2021_3779_MOESM2_ESM.pdf [file 122_2021_3779_MOESM2_ESM.pdf]

Theoretical and Applied Genetics

**Early prediction of biomass in hybrid rye based on hyperspectral data surpasses genomic predictability in less-related breeding material**

Rodrigo José Galán<sup>1</sup>, Angela-Maria Bernal-Vasquez<sup>2</sup>, Christian Jebsen<sup>2</sup>, Hans-Peter Piepho<sup>3</sup>, Patrick Thorwarth<sup>1,2</sup>, Philipp Steffan<sup>4</sup>, Andres Gordillo<sup>4</sup>, Thomas Miedaner<sup>1</sup>.

<sup>1</sup> State Plant Breeding Institute, University of Hohenheim, 70593 Stuttgart, Germany.

<sup>2</sup> KWS SAAT SE, Grimsehlstraße 31, 37574 Einbeck, Germany.

<sup>3</sup> Biostatistics Unit, Institute of Crop Science, University of Hohenheim, 70593 Stuttgart, Germany.

<sup>4</sup> KWS LOCHOW GMBH, Ferdinand-von-Lochow Straße 5, 29303 Bergen, Germany.

Corresponding author:

Thomas Miedaner

e-mail: thomas.miedaner@uni-hohenheim.de

Telephone No.: +49 711 459-22690

Available ORCID of the authors:

Angela-Maria Bernal-Vasquez: <https://orcid.org/0000-0003-0415-831>

Patrick Thorwarth: <https://orcid.org/0000-0003-4456-2358>

Thomas Miedaner: <https://orcid.org/0000-0002-9541-3726>

## Online resource 2

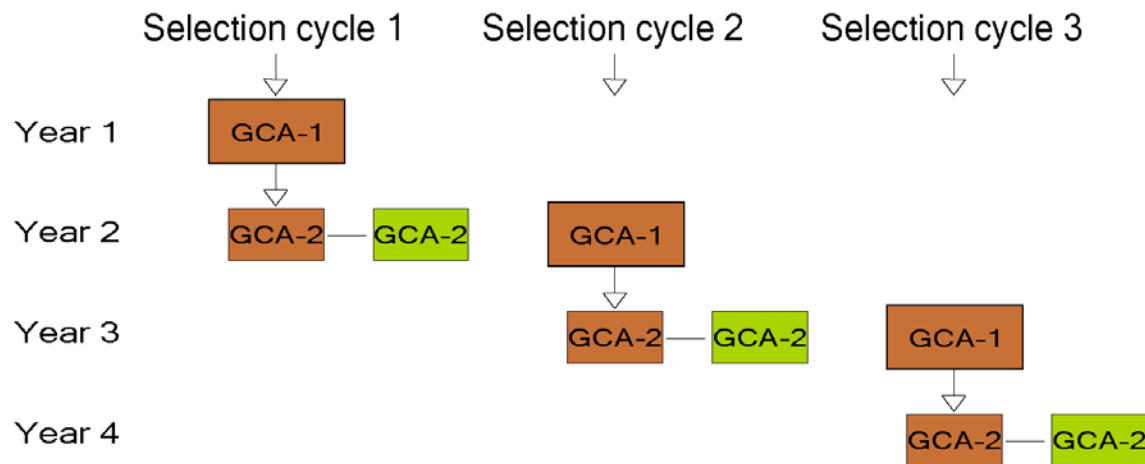

**Supplementary Fig. S1** Schematic representation of the selection cycles in hybrid rye breeding program (adapted from Bernal-Vasquez et al. 2017). For across-cycles prediction, phenotypic, molecular, and hyperspectral data for model training could be collected in the second general combining ability trials (GCA-2), whereas prediction and validation are performed among the first GCA trial (GCA-1) and GCA-2 of a subsequent selection cycle, respectively. Brown boxes stand for grain yield trials, while green boxes for biomass trials.

Reference: Bernal-Vasquez A-M, Gordillo A, Schmidt M, Piepho H-P (2017) Genomic prediction in early selection stages using multi-year data in a hybrid rye breeding program. *BMC Genet* 18(1):51. doi: 10.1186/s12863-017-0512-8

|                 |         | Parental line B |        |        |        |        |        |        |        |        |         |
|-----------------|---------|-----------------|--------|--------|--------|--------|--------|--------|--------|--------|---------|
|                 |         | Line 1          | Line 2 | Line 3 | Line 4 | Line 5 | Line 6 | Line 7 | Line 8 | Line 9 | Line 10 |
| Parental line A | Line 1  |                 | 30     |        |        |        |        |        |        |        | 26      |
|                 | Line 2  |                 |        | 32     |        |        |        |        |        |        |         |
|                 | Line 3  |                 |        |        | 32     |        |        |        |        |        |         |
|                 | Line 4  |                 |        |        |        | 4      |        |        |        |        |         |
|                 | Line 5  |                 |        |        |        |        | 30     |        |        |        |         |
|                 | Line 6  |                 |        |        |        |        |        | 24     |        |        |         |
|                 | Line 7  |                 |        |        |        |        |        |        | 30     |        |         |
|                 | Line 8  |                 |        |        |        |        |        |        |        | 28     |         |
|                 | Line 9  |                 |        |        |        |        |        |        |        |        | 28      |
|                 | Line 10 |                 |        |        |        |        |        |        |        |        |         |

**Supplementary Fig. S2** Schematic representation of the single-round robin design used in the present study. The F1 plants ( $n=264$ ) were derived from each of the chain crosses (shaded cells showing the size of each bi-parental family). Adapted from Verhoeven *et al.* (2006)

Reference: Verhoeven KJF, Jannink JL, McIntyre LM (2006) Using mating designs to uncover QTL and the genetic architecture of complex traits. *Heredity* 96(2):139–149

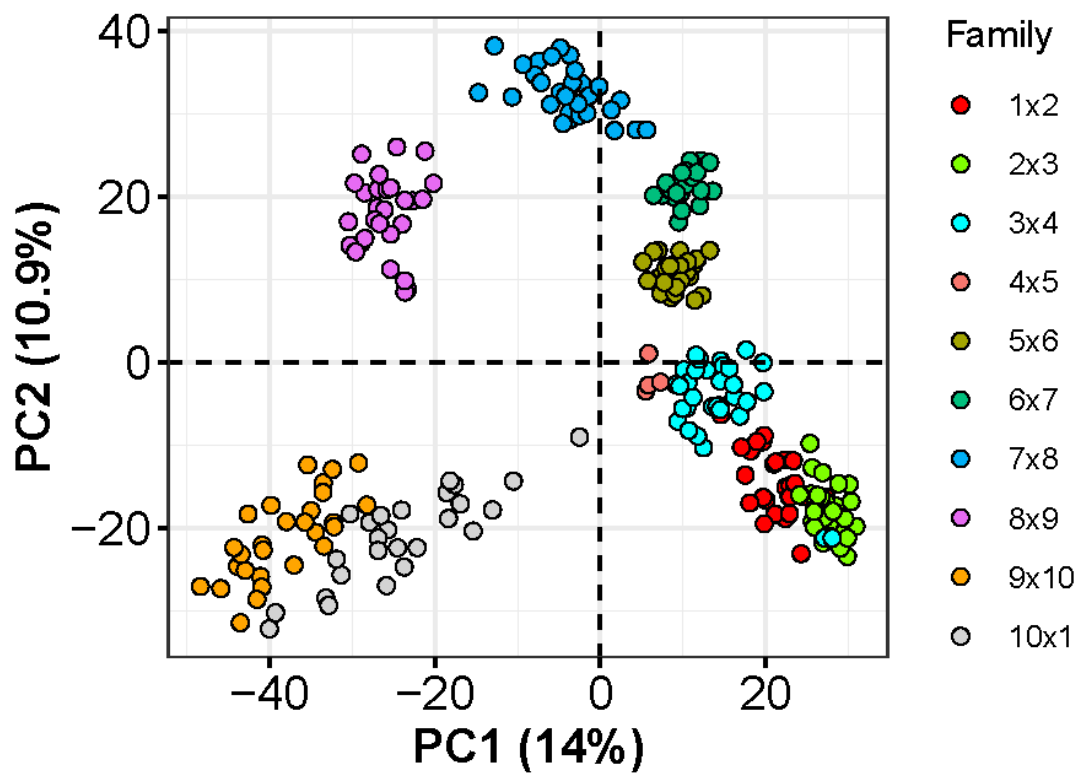

**Supplementary Fig. S3** Principal component analysis (PCA) of the ten bi-parental families based on SNP data showing the outcome for the first two principal components.

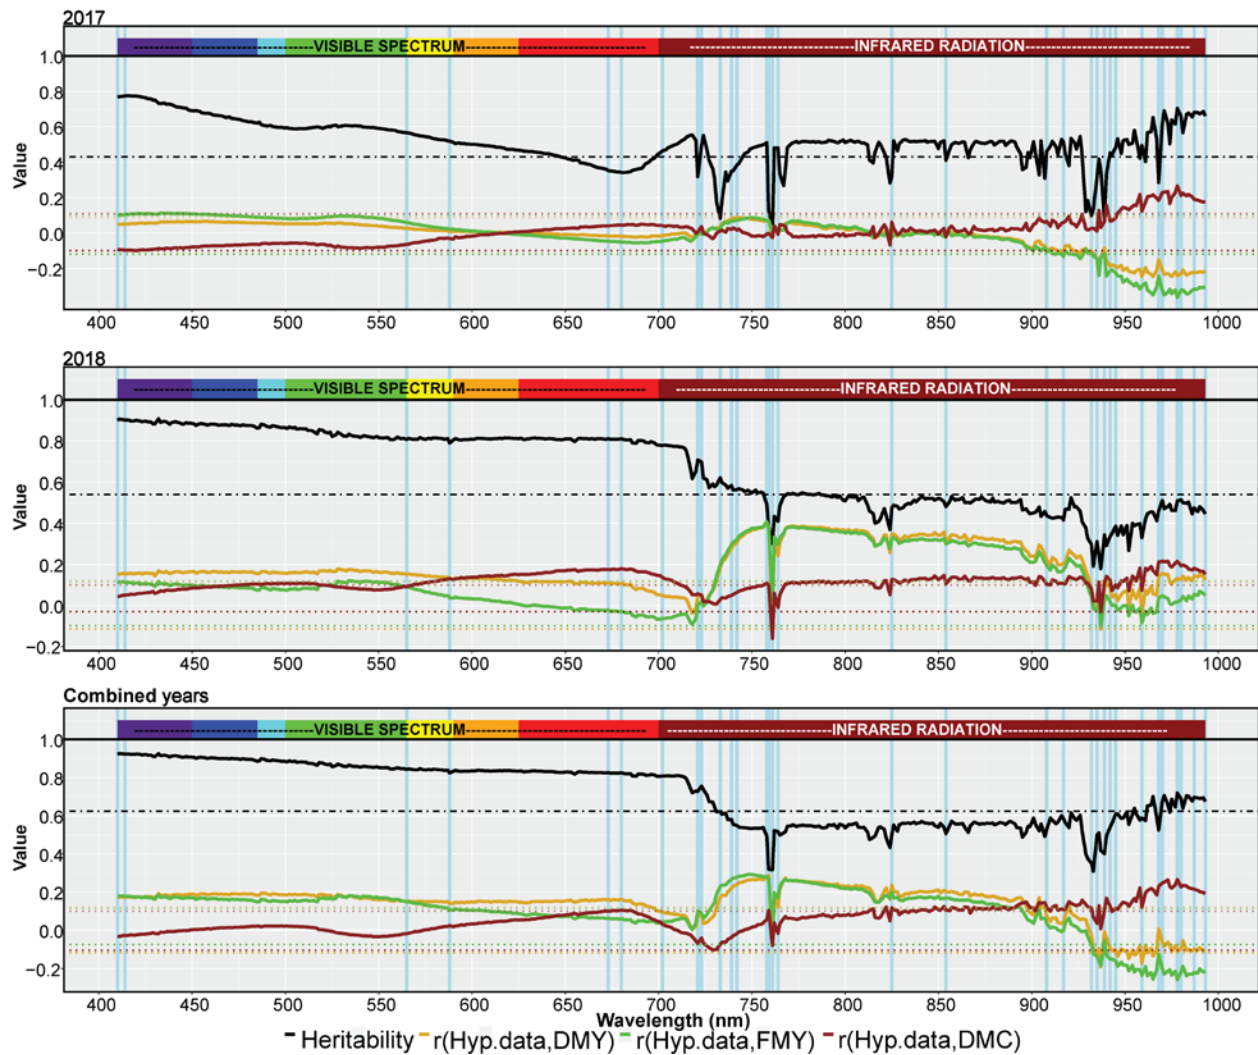

**Supplementary Fig. S4** Heritability estimates (black line) for the hyperspectral bands, phenotypic correlations ( $r$ ) between hyperspectral bands and dry matter yield (yellow line), fresh matter yield (green line), and dry matter content (brown line), and selected hyperspectral bands after the least absolute shrinkage and selection operator (Lasso, light blue vertical lines) for 274 winter rye hybrids assessed in two years, which were individually and combined analyzed. The mean heritability across selected wavelengths is denoted by the dot-dashed black line. Correlation estimates (in absolute values)  $\geq$  to the respective dotted lines are significant ( $p < 0.05$ ).
